# Supplementary material
Source: Springer Nature journal article supplement (https://www.springermedizin.de/resource/supplementary/40164_2012_27_MOESM1_ESM.pdf/9687044)
Supplement: MOESM1 [file 9687044]

Gastric DLBCL

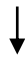

staging

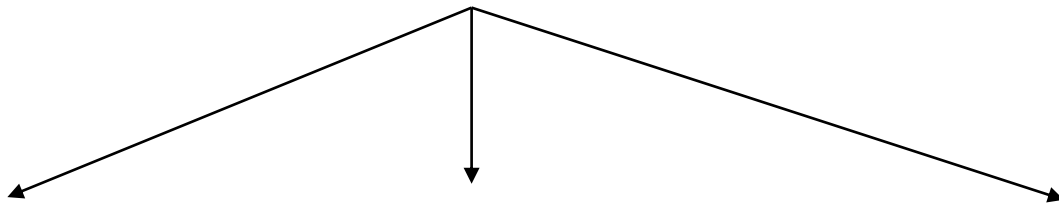

stage I (non bulky)

stage II, IV (non bulky)

Bulky disease

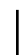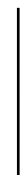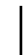

RCHOP 3 cycles

RCHOP 6 cycles

RCHOP 6 cycles

PET/CT, gastroscopy

PET/CT, gastroscopy

CR

PR

CR

PR

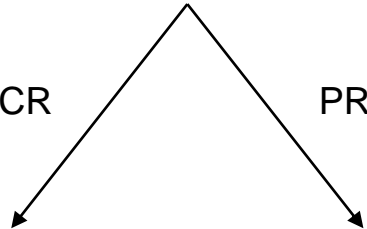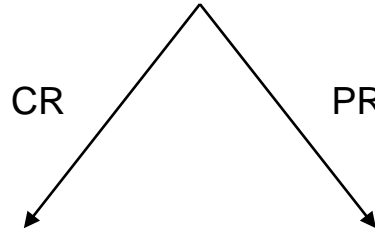

30.6 Gy RT

39.6 or 40 Gy

30.6 Gy RT

39.6 or 40 Gy
